# Supplementary material
Source: MDPI journal article supplement (https://www.mdpi.com/2073-4344/8/2/54)
Supplement: s1 [file s1]

Supplementary Materials: Exploring the Effect of Au/Pt Ratio on Glycerol Oxidation in Presence and Absence of a Base

Alberto Villa 1,*, Andrea Jouve 1, Felipe J. Sanchez Trujillo 2, Davide Motta 2, Laura Prati 1 and Nikolaos Dimitratos 2,*

2. Results


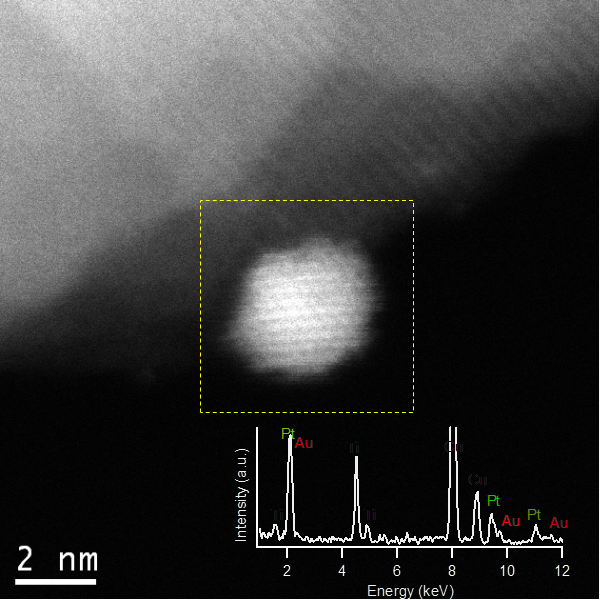


**Figure S1.** Representative STEM-HAADF image of Au6Pt4/TiO2 catalyst and the corresponding XEDS spectra obtained from the individual nanoparticle.


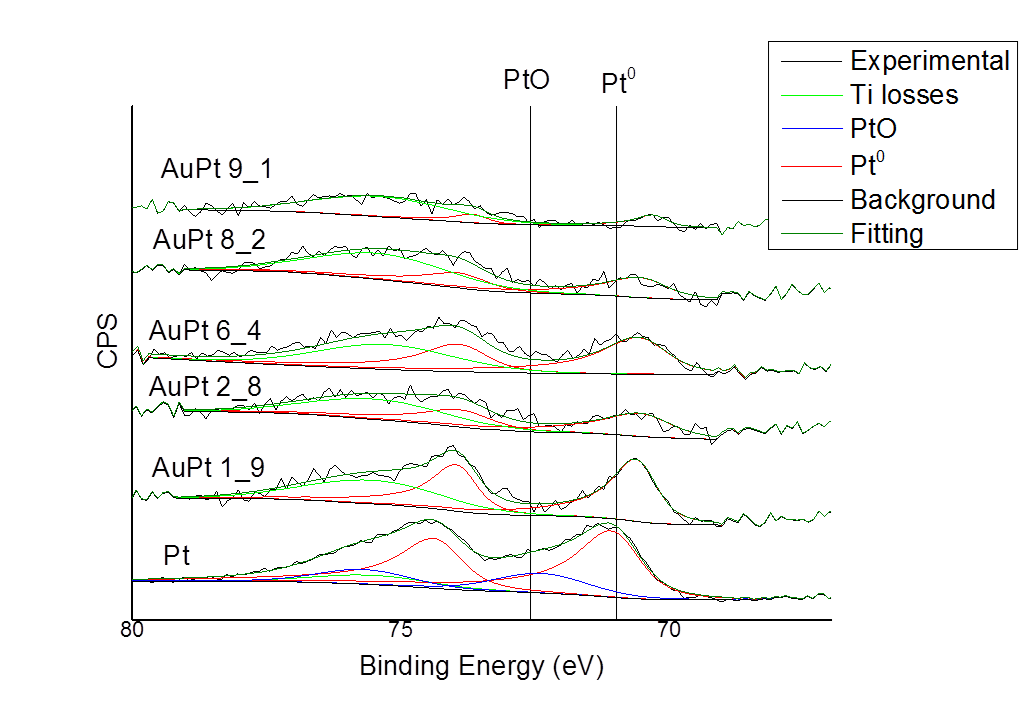


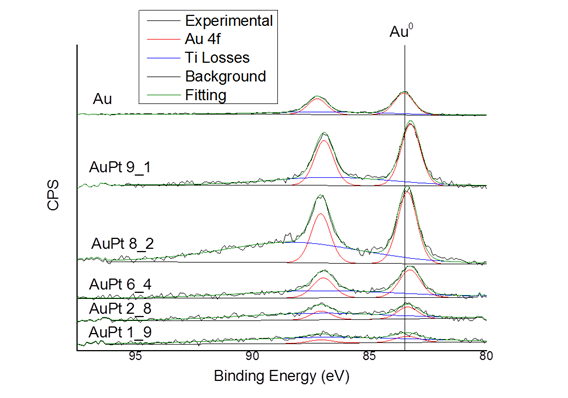


**F**igure S2. XPS Spectra for AuPt/TiO2 sample





**F**igure S3. Selectivity versus time one stream for Au9Pt1/TiO2 in presence of NaOH.
